# Supplementary material for: Longitudinal Serum Proteome Characterization of COVID-19 Patients With Different Severities Revealed Potential Therapeutic Strategies
Source: Front Immunol. 2022 Jul 26;13:893943. doi: 10.3389/fimmu.2022.893943 (PMC9361788; doi:10.3389/fimmu.2022.893943)
Supplement: Supplementary file 4 [file Table_3.xlsx]

## Sheet: Legend
Table S3. Differentially expressed proteins.
Table S3-A. Enriched KEGG pathways and protein alterations in severe/critical patients compared with other COVID-19 patients (supplementary data for Fig.2).
Table S3-B. Enriched KEGG pathways and protein alterations in asymptomatic patients compared with mild COVID-19 patients (supplementary data for Fig.3).
Table S3-C. Enriched KEGG pathways and protein alterations in asymptomatic patients compared with all the symptomatic COVID-19 patients (supplementary data for Fig.3).
Table S3-D. Cluster anaysis result of all the samples (shown in Fig.4A).
Table S3-E. Enriched KEGG pathways and protein alterations between COVID-19 patients in clusters C2 and C1 (supplementary data for Fig.4B).
Table S3-F. Enriched KEGG pathways and protein alterations between COVID-19 patients in cluster C3 and other clusters (supplementary data for Fig.4B).
Table S3-G. Enriched KEGG pathways and protein alterations between moderate patients in clusters C2 and C1 (supplementary data for Fig.4C).
Table S3-H. Enriched KEGG pathways and protein alterations between severe/critical and moderate patients in cluster C2 (supplementary data for Fig.4D).

## Sheet: A. for Fig.2
Table S3-A. Enriched KEGG pathways and protein alterations in severe/critical patients compared with other COVID-19 patients (supplementary data for Fig.2).
Significantly enriched KEGG pathways
Up-regulated
TermID	Term	Protein number	p value	Gene Name
path:hsa04064	NF-kappa B signaling pathway	4	0.000851761	ICAM1,CD14,LBP,VCAM1
path:hsa00030	Pentose phosphate pathway	6	0.00123694	H6PD,ALDOA,ALDOB,GPI,TKT,TALDO1
path:hsa04612	Antigen processing and presentation	6	0.00266748	HSP90AA1,HLA-C,HSPA8,CALR,PDIA3,B2M
path:hsa05169	Epstein-Barr virus infection	5	0.00509341	ICAM1,HLA-C,CALR,PDIA3,B2M
path:hsa04657	IL-17 signaling pathway	4	0.00962631	S100A8,S100A9,HSP90AA1,HSP90B1
Down-regulated
TermID	Term	Protein number	p value	Gene Name
path:hsa04935	Growth hormone synthesis, secretion and action	3	0.000940026	IGFALS,IGF1,IGFBP3
path:hsa04979	Cholesterol metabolism	4	0.00169313	CETP,APOA2,APOC1,APOH
Differential proteins
Accession	Description	Gene Name	Fold change	p value
P02741	C-reactive protein	CRP	6.07052	0
P0DJI8	Serum amyloid A-1 protein	SAA1	3.557	1e-06
P0DJI9	Serum amyloid A-2 proteincur	SAA2	3.11213	2e-06
P06732	Creatine kinase M-type	CKM	2.53425	0.034503
Q08830	Fibrinogen-like protein 1	FGL1	2.46734	4.2e-05
Q16851	UTP--glucose-1-phosphate uridylyltransferase	UGP2	2.37636	0.00072
P61769	Beta-2-microglobulin	B2M	2.24364	0.003339
P18428	Lipopolysaccharide-binding protein	LBP	2.20914	0
Q8N6C8	Leukocyte immunoglobulin-like receptor subfamily A member 3	LILRA3	2.01302	0.014975
P01011	Alpha-1-antichymotrypsin	SERPINA3	1.97408	0
P62258	14-3-3 protein epsilon	YWHAE	1.85812	0.002343
P02763	Alpha-1-acid glycoprotein 1	ORM1	1.83917	0
Q14697	Neutral alpha-glucosidase AB	GANAB	1.81434	0.007051
Q8NBJ4	Golgi membrane protein 1	GOLM1	1.80787	2e-05
P07988	Pulmonary surfactant-associated protein B	SFTPB	1.79859	7e-06
P25786	Proteasome subunit alpha type-1	PSMA1	1.78956	0.00038
P07900	Heat shock protein HSP 90-alpha	HSP90AA1	1.7869	4e-06
P23381	Tryptophan--tRNA ligase, cytoplasmic	WARS1	1.77955	0.000384
O75874	Isocitrate dehydrogenase [NADP] cytoplasmic	IDH1	1.77313	0.019879
P00738	Haptoglobin	HP	1.75846	1.4e-05
O14818	Proteasome subunit alpha type-7	PSMA7	1.75793	2.9e-05
Q16777	Histone H2A type 2-C	H2AC20	1.7536	0.028957
P60709	Actin, cytoplasmic 1	ACTB	1.73686	0.000135
P23141	Liver carboxylesterase 1	CES1	1.70479	0.047004
P13796	Plastin-2	LCP1	1.69046	0
P20618	Proteasome subunit beta type-1	PSMB1	1.68976	0.004193
P02792	Ferritin light chain	FTL	1.6879	0.002497
P02750	Leucine-rich alpha-2-glycoprotein	LRG1	1.62583	0
Q04917	14-3-3 protein eta	YWHAH	1.6166	0.005282
P00325	All-trans-retinol dehydrogenase [NAD(+)] ADH1B	ADH1B	1.59088	0.00425
Q02818	Nucleobindin-1	NUCB1	1.58471	0.000725
P02748	Complement component C9	C9	1.58216	2e-06
P09960	Leukotriene A-4 hydrolase	LTA4H	1.58019	0.000104
P18065	Insulin-like growth factor-binding protein 2	IGFBP2	1.56467	1e-06
Q86UD1	Out at first protein homolog	OAF	1.54573	2.5e-05
P26038	Moesin	MSN	1.53284	7.9e-05
P08571	Monocyte differentiation antigen CD14	CD14	1.53224	1.4e-05
P19320	Vascular cell adhesion protein 1	VCAM1	1.5321	0
Q9UJJ9	N-acetylglucosamine-1-phosphotransferase subunit gamma	GNPTG	1.5217	0.000396
P06702	Protein S100-A9	S100A9	1.51723	0.009633
P05109	Protein S100-A8	S100A8	1.51092	0.011436
P40925	Malate dehydrogenase, cytoplasmic	MDH1	1.50317	0.001968
P63104	14-3-3 protein zeta/delta	YWHAZ	1.4985	0.002973
Q5QNW6	Histone H2B type 2-F	H2BC18	1.4918	0.020649
P58166	Inhibin beta E chain	INHBE	1.48878	0.030224
Q8NBP7	Proprotein convertase subtilisin/kexin type 9	PCSK9	1.47622	0.000148
P01009	Alpha-1-antitrypsin	SERPINA1	1.47102	0
P15291	Beta-1,4-galactosyltransferase 1	B4GALT1	1.46346	0.00182
P06744	Glucose-6-phosphate isomerase	GPI	1.45933	0.014896
P60953	Cell division control protein 42 homolog	CDC42	1.45699	0.046391
P00338	L-lactate dehydrogenase A chain	LDHA	1.4527	0.000591
P05155	Plasma protease C1 inhibitor	SERPING1	1.44497	1e-06
P04275	von Willebrand factor	VWF	1.44098	0.000128
P07195	L-lactate dehydrogenase B chain	LDHB	1.44034	1e-06
Q06033	Inter-alpha-trypsin inhibitor heavy chain H3	ITIH3	1.44028	1e-05
P06733	Alpha-enolase	ENO1	1.4287	0.005443
Q8WWA0	Intelectin-1	ITLN1	1.42636	0.025657
P07307	Asialoglycoprotein receptor 2	ASGR2	1.42562	7.1e-05
P19652	Alpha-1-acid glycoprotein 2	ORM2	1.42289	0.000315
P22897	Macrophage mannose receptor 1	MRC1	1.42174	0.000469
Q9HDC9	Adipocyte plasma membrane-associated protein	APMAP	1.42036	4.5e-05
P37837	Transaldolase	TALDO1	1.4147	0.027921
P62805	Histone H4	H4C1	1.41191	0.013088
Q08380	Galectin-3-binding protein	LGALS3BP	1.40277	0.001507
P05062	Fructose-bisphosphate aldolase B	ALDOB	1.39342	0.000802
Q12841	Follistatin-related protein 1	FSTL1	1.39109	0.017881
P11226	Mannose-binding protein C	MBL2	1.38553	0.021312
P35542	Serum amyloid A-4 protein	SAA4	1.38182	8.7e-05
P30740	Leukocyte elastase inhibitor	SERPINB1	1.38102	0.013203
Q86U17	Serpin A11	SERPINA11	1.37593	2.4e-05
Q02985	Complement factor H-related protein 3	CFHR3	1.37341	0.002751
P06681	Complement C2	C2	1.36676	2e-06
Q9UK55	Protein Z-dependent protease inhibitor	SERPINA10	1.35658	6.4e-05
Q9UBR2	Cathepsin Z	CTSZ	1.33886	0.033854
P12259	Coagulation factor V	F5	1.33628	1e-05
P29401	Transketolase	TKT	1.33229	0.00247
P10321	HLA class I histocompatibility antigen, C alpha chain	HLA-C	1.32269	0.036352
P07339	Cathepsin D	CTSD	1.3185	0.000501
P11142	Heat shock cognate 71 kDa protein	HSPA8	1.31245	0.005515
P00751	Complement factor B	CFB	1.30261	0.000141
P02743	Serum amyloid P-component	APCS	1.29801	0.003339
O95479	GDH/6PGL endoplasmic bifunctional protein	H6PD	1.29232	0.005646
P01019	Angiotensinogen	AGT	1.2818	0.000274
Q92820	Gamma-glutamyl hydrolase	GGH	1.279	0.001848
P01833	Polymeric immunoglobulin receptor	PIGR	1.2783	0.004195
P02671	Fibrinogen alpha chain	FGA	1.27806	0.00108
O95497	Pantetheinase	VNN1	1.27524	0.019426
Q14624	Inter-alpha-trypsin inhibitor heavy chain H4	ITIH4	1.27219	0
P04040	Catalase	CAT	1.26561	0.009305
P0C0L5	Complement C4-B	C4B	1.26526	0.035763
Q15063	Periostin	POSTN	1.265	0.005246
Q9NZP8	Complement C1r subcomponent-like protein	C1RL	1.26233	1e-05
P54289	Voltage-dependent calcium channel subunit alpha-2/delta-1	CACNA2D1	1.25978	0.009603
P14625	Endoplasmin	HSP90B1	1.25844	1.1e-05
Q6YHK3	CD109 antigen	CD109	1.25403	0.008917
P14543	Nidogen-1	NID1	1.25281	0.006529
Q92823	Neuronal cell adhesion molecule	NRCAM	1.24723	0.009881
P00390	Glutathione reductase, mitochondrial	GSR	1.24667	0.000345
P00450	Ceruloplasmin	CP	1.24614	8e-06
P04075	Fructose-bisphosphate aldolase A	ALDOA	1.24475	0.004356
Q02413	Desmoglein-1	DSG1	1.24346	0.008888
Q86SQ4	Adhesion G-protein coupled receptor G6	ADGRG6	1.24315	0.005206
P27797	Calreticulin	CALR	1.24001	0.004455
P07357	Complement component C8 alpha chain	C8A	1.23853	0.001036
Q15582	Transforming growth factor-beta-induced protein ig-h3	TGFBI	1.23045	0.000135
Q9BXR6	Complement factor H-related protein 5	CFHR5	1.22929	3.5e-05
P13671	Complement component C6	C6	1.22795	6e-06
P05362	Intercellular adhesion molecule 1	ICAM1	1.21867	0.000993
P22792	Carboxypeptidase N subunit 2	CPN2	1.21777	0.000117
P15151	Poliovirus receptor	PVR	1.21653	0.002579
P30101	Protein disulfide-isomerase A3	PDIA3	1.21461	0.009212
P04114	Apolipoprotein B-100	APOB	1.21147	0.002973
P23142	Fibulin-1	FBLN1	1.20993	0.000768
P22352	Glutathione peroxidase 3	GPX3	1.20989	0.000591
Q14520	Hyaluronan-binding protein 2	HABP2	1.20739	0.000541
P60763	Ras-related C3 botulinum toxin substrate 3	RAC3	1.20294	0.04461
P55103	Inhibin beta C chain	INHBC	1.20121	0.004694
P27169	Serum paraoxonase/arylesterase 1	PON1	0.831294	0.000395
P06727	Apolipoprotein A-IV	APOA4	0.827945	0.019377
Q96PD5	N-acetylmuramoyl-L-alanine amidase	PGLYRP2	0.827124	0.005443
Q9NQ79	Cartilage acidic protein 1	CRTAC1	0.826421	0.020649
P35858	Insulin-like growth factor-binding protein complex acid labile subunit	IGFALS	0.824604	0.019377
Q01459	Di-N-acetylchitobiase	CTBS	0.818404	0.021312
Q6UXB8	Peptidase inhibitor 16	PI16	0.813032	0.021312
Q15485	Ficolin-2	FCN2	0.810455	0.025692
P54802	Alpha-N-acetylglucosaminidase	NAGLU	0.810359	0.007406
P02765	Alpha-2-HS-glycoprotein	AHSG	0.805062	4.5e-05
P02749	Beta-2-glycoprotein 1	APOH	0.803103	0.000802
P51884	Lumican	LUM	0.797934	0.001388
P43652	Afamin	AFM	0.792445	3.9e-05
Q9UHG3	Prenylcysteine oxidase 1	PCYOX1	0.790204	0.002973
P02652	Apolipoprotein A-II	APOA2	0.788703	1e-05
P02775	Platelet basic protein	PPBP	0.785326	0.000874
P17936	Insulin-like growth factor-binding protein 3	IGFBP3	0.785178	0.00033
P29622	Kallistatin	SERPINA4	0.781083	2.4e-05
P11597	Cholesteryl ester transfer protein	CETP	0.777088	0.004356
P24593	Insulin-like growth factor-binding protein 5	IGFBP5	0.771928	0.008572
P10720	Platelet factor 4 variant	PF4V1	0.763396	0.03229
P02753	Retinol-binding protein 4	RBP4	0.761899	0.000274
P04196	Histidine-rich glycoprotein	HRG	0.752866	0.000495
P02654	Apolipoprotein C-I	APOC1	0.747891	0.002445
O75144	ICOS ligand	ICOSLG	0.745939	0.000297
Q14533	Keratin, type II cuticular Hb1	KRT81	0.738937	0.021642
P02751	Fibronectin	FN1	0.733914	0.003091
P02766	Transthyretin	TTR	0.730165	0.000198
Q13477	Mucosal addressin cell adhesion molecule 1	MADCAM1	0.717636	0.038072
A0A075B6S6	Immunoglobulin kappa variable 2D-30	IGKV2D-30	0.670021	0.023474
P05019	Insulin-like growth factor I	IGF1	0.646779	0.000728
P30044	Peroxiredoxin-5, mitochondrial	PRDX5	0.63143	0.014395
P01880	Immunoglobulin heavy constant delta	IGHD	0.613202	0.032729

## Sheet: B. for Fig.3
Table S3-B. Enriched KEGG pathways and protein alterations in asymptomatic patients compared with mild COVID-19 patients (supplementary data for Fig.3).
Significantly enriched KEGG pathways
Up-regulated
TermID	Term	Protein number	p value	Gene Name
path:hsa04350	TGF-beta signaling pathway	3	0.00102582	TGFB1,THBS1,LTBP1
path:hsa05144	Malaria	3	0.00446009	TGFB1,THBS1,SELP
Down-regulated
NA
Differential proteins
Accession	Description	Gene Name	Fold change	p value
Q9ULV4	Coronin-1C	CORO1C	2.12071	0.039008
Q15942	Zyxin	ZYX	1.69745	0.028351
Q86YW5	Trem-like transcript 1 protein	TREML1	1.65208	0.000276
O00151	PDZ and LIM domain protein 1	PDLIM1	1.56464	0.003163
O75368	SH3 domain-binding glutamic acid-rich-like protein	SH3BGRL	1.5345	0.033895
P62820	Ras-related protein Rab-1A	RAB1A	1.48915	0.005774
P14780	Matrix metalloproteinase-9	MMP9	1.46084	0.026857
P35579	Myosin-9	MYH9	1.43337	0.016639
A0A075B6I0	Immunoglobulin lambda variable 8-61	IGLV8-61	1.39299	0.045201
Q9NQ79	Cartilage acidic protein 1	CRTAC1	1.36086	0.001874
P23284	Peptidyl-prolyl cis-trans isomerase B	PPIB	1.35578	0.035036
Q9Y490	Talin-1	TLN1	1.35554	0.045201
P01137	Transforming growth factor beta-1 proprotein	TGFB1	1.35534	0.015737
P07996	Thrombospondin-1	THBS1	1.35266	0.00719
P36980	Complement factor H-related protein 2	CFHR2	1.33473	0.039833
P05164	Myeloperoxidase	MPO	1.31614	0.030704
P10721	Mast/stem cell growth factor receptor Kit	KIT	1.30554	0.019405
Q14766	Latent-transforming growth factor beta-binding protein 1	LTBP1	1.26317	0.005217
Q86UX7	Fermitin family homolog 3	FERMT3	1.26164	0.033006
Q13201	Multimerin-1	MMRN1	1.25052	0.005217
P18206	Vinculin	VCL	1.22577	0.00719
Q9H4G4	Golgi-associated plant pathogenesis-related protein 1	GLIPR2	1.21883	0.002663
P16109	P-selectin	SELP	1.20067	0.04778
P01023	Alpha-2-macroglobulin	A2M	0.778471	0.039833
P61769	Beta-2-microglobulin	B2M	0.775724	0.039833
Q99784	Noelin	OLFM1	0.705406	0.011559
Q08380	Galectin-3-binding protein	LGALS3BP	0.663247	0.001874

## Sheet: C. for Fig.3
Table S3-C. Enriched KEGG pathways and protein alterations in asymptomatic patients compared with all the symptomatic COVID-19 patients (supplementary data for Fig.3).
Significantly enriched KEGG pathways
Up-regulated
TermID	Term	Protein number	p value	Gene Name
path:hsa04060	Cytokine-cytokine receptor interaction	4	0.00202969	TGFB1,PPBP,PF4V1,IL1RAP
path:hsa05205	Proteoglycans in cancer	6	0.00332751	TGFB1,FN1,IGF1,THBS1,MMP9,LUM
path:hsa04350	TGF-beta signaling pathway	3	0.00663313	TGFB1,THBS1,LTBP1
Down-regulated
TermID	Term	Protein number	p value	Gene Name
path:hsa04610	Complement and coagulation cascades	17	3.2538e-07	CFB,SERPINA1,C9,C4BPA,SERPING1,CFI,C2,C8A,C8B,C4A,C4B,MBL2,F5,C6,C4BPB,CFHR3,CFHR5
path:hsa05133	Pertussis	7	0.000208554	C4BPA,SERPING1,C2,CD14,C4A,C4B,C4BPB
path:hsa04064	NF-kappa B signaling pathway	3	0.00188586	CD14,LBP,VCAM1
path:hsa05322	Systemic lupus erythematosus	7	0.00428674	C9,C2,C8A,C8B,C4A,C4B,C6
path:hsa04620	Toll-like receptor signaling pathway	2	0.0064916	CD14,LBP
Differential proteins
Accession	Description	Gene Name	Fold change	p value
P14780	Matrix metalloproteinase-9	MMP9	1.53073	0.000189
P02751	Fibronectin	FN1	1.4261	3.4e-05
P02788	Lactotransferrin	LTF	1.40308	0.001078
P04196	Histidine-rich glycoprotein	HRG	1.39761	6e-06
Q86YW5	Trem-like transcript 1 protein	TREML1	1.38437	3e-05
P05154	Plasma serine protease inhibitor	SERPINA5	1.34524	0.000291
P35579	Myosin-9	MYH9	1.34476	0.008587
P02654	Apolipoprotein C-I	APOC1	1.33534	3.9e-05
Q9UHG3	Prenylcysteine oxidase 1	PCYOX1	1.33194	3.2e-05
P04278	Sex hormone-binding globulin	SHBG	1.31844	0.00783
Q15113	Procollagen C-endopeptidase enhancer 1	PCOLCE	1.30821	0.000368
Q15485	Ficolin-2	FCN2	1.30814	0.005835
P05019	Insulin-like growth factor I	IGF1	1.29949	0.036577
Q9NQ79	Cartilage acidic protein 1	CRTAC1	1.29843	8.6e-05
P07996	Thrombospondin-1	THBS1	1.28856	0.000443
P29622	Kallistatin	SERPINA4	1.28606	1e-06
P10720	Platelet factor 4 variant	PF4V1	1.28439	0.010106
P11597	Cholesteryl ester transfer protein	CETP	1.2816	0.001033
P02766	Transthyretin	TTR	1.27529	0.000485
P01709	Immunoglobulin lambda variable 2-8	IGLV2-8	1.27148	0.00431
P00488	Coagulation factor XIII A chain	F13A1	1.25522	0.000368
Q86UX7	Fermitin family homolog 3	FERMT3	1.25473	0.010677
Q14766	Latent-transforming growth factor beta-binding protein 1	LTBP1	1.24509	0.000247
P01137	Transforming growth factor beta-1 proprotein	TGFB1	1.24278	0.004849
P07359	Platelet glycoprotein Ib alpha chain	GP1BA	1.2425	0.001791
P01766	Immunoglobulin heavy variable 3-13	IGHV3-13	1.24242	0.026407
P54802	Alpha-N-acetylglucosaminidase	NAGLU	1.23817	0.010194
P02749	Beta-2-glycoprotein 1	APOH	1.23748	0.00032
P05452	Tetranectin	CLEC3B	1.23426	3e-06
P02647	Apolipoprotein A-I	APOA1	1.22864	1.1e-05
Q96PD5	N-acetylmuramoyl-L-alanine amidase	PGLYRP2	1.22745	0.000508
P40197	Platelet glycoprotein V	GP5	1.22676	0.000556
Q15166	Serum paraoxonase/lactonase 3	PON3	1.22233	0.000443
P10721	Mast/stem cell growth factor receptor Kit	KIT	1.22077	0.003057
P51884	Lumican	LUM	1.21945	0.001718
Q96S96	Phosphatidylethanolamine-binding protein 4	PEBP4	1.21767	0.040495
P02765	Alpha-2-HS-glycoprotein	AHSG	1.21604	5.4e-05
Q9NPH3	Interleukin-1 receptor accessory protein	IL1RAP	1.21157	0.000305
P19823	Inter-alpha-trypsin inhibitor heavy chain H2	ITIH2	1.21015	1e-05
Q13201	Multimerin-1	MMRN1	1.20712	0.001335
P02775	Platelet basic protein	PPBP	1.20472	0.000696
P43652	Afamin	AFM	1.2009	0.000265
P33908	Mannosyl-oligosaccharide 1,2-alpha-mannosidase IA	MAN1A1	0.823036	0.004148
P06744	Glucose-6-phosphate isomerase	GPI	0.821249	0.0459
P0DOY3	Immunoglobulin lambda constant 3	IGLC3	0.820822	0.014208
P07358	Complement component C8 beta chain	C8B	0.818677	6.3e-05
P13671	Complement component C6	C6	0.817043	9.5e-05
Q9BXR6	Complement factor H-related protein 5	CFHR5	0.811788	0.001033
Q92820	Gamma-glutamyl hydrolase	GGH	0.808106	0.003991
P05155	Plasma protease C1 inhibitor	SERPING1	0.805576	0.004479
P05156	Complement factor I	CFI	0.803144	2e-06
Q9NZP8	Complement C1r subcomponent-like protein	C1RL	0.798661	3.7e-05
P00450	Ceruloplasmin	CP	0.796584	1.1e-05
A0A0A0MT89	Immunoglobulin kappa joining 1	IGKJ1	0.789629	0.047977
Q02985	Complement factor H-related protein 3	CFHR3	0.788479	0.04953
P07357	Complement component C8 alpha chain	C8A	0.782952	3.2e-05
P13796	Plastin-2	LCP1	0.782222	0.003991
P20851	C4b-binding protein beta chain	C4BPB	0.77633	4e-06
P07307	Asialoglycoprotein receptor 2	ASGR2	0.776249	0.003551
P12259	Coagulation factor V	F5	0.771763	0.000485
Q8NBP7	Proprotein convertase subtilisin/kexin type 9	PCSK9	0.767707	0.005621
O75636	Ficolin-3	FCN3	0.7635	0.000128
Q06033	Inter-alpha-trypsin inhibitor heavy chain H3	ITIH3	0.763404	0.002916
P01009	Alpha-1-antitrypsin	SERPINA1	0.758924	1.3e-05
P01706	Immunoglobulin lambda variable 2-11	IGLV2-11	0.754759	0.016805
P19320	Vascular cell adhesion protein 1	VCAM1	0.751492	0.000665
P04003	C4b-binding protein alpha chain	C4BPA	0.747386	0
P06702	Protein S100-A9	S100A9	0.738604	0.044136
O14791	Apolipoprotein L1	APOL1	0.735994	0.000148
P06681	Complement C2	C2	0.735987	3e-06
P19652	Alpha-1-acid glycoprotein 2	ORM2	0.722548	0.000404
P01861	Immunoglobulin heavy constant gamma 4	IGHG4	0.720234	0.02327
P11226	Mannose-binding protein C	MBL2	0.719129	0.011973
P30740	Leukocyte elastase inhibitor	SERPINB1	0.718382	0.005239
O14818	Proteasome subunit alpha type-7	PSMA7	0.711055	0.036566
Q86UD1	Out at first protein homolog	OAF	0.708001	0.002899
P06310	Immunoglobulin kappa variable 2-30	IGKV2-30	0.704532	0.005835
P0C0L4	Complement C4-A	C4A	0.681388	1e-06
P00739	Haptoglobin-related protein	HPR	0.67064	0.000164
P00751	Complement factor B	CFB	0.660892	0
P0C0L5	Complement C4-B	C4B	0.658116	1.3e-05
P35542	Serum amyloid A-4 protein	SAA4	0.657616	3e-06
P02743	Serum amyloid P-component	APCS	0.63846	1e-05
P08571	Monocyte differentiation antigen CD14	CD14	0.619903	1e-05
Q08380	Galectin-3-binding protein	LGALS3BP	0.587474	1e-06
P02750	Leucine-rich alpha-2-glycoprotein	LRG1	0.580824	3e-06
P01011	Alpha-1-antichymotrypsin	SERPINA3	0.56709	1e-06
Q8NBJ4	Golgi membrane protein 1	GOLM1	0.566043	0.0002
P02748	Complement component C9	C9	0.55208	1e-06
P18428	Lipopolysaccharide-binding protein	LBP	0.519917	1.6e-05
P61769	Beta-2-microglobulin	B2M	0.504734	0.045436
P02763	Alpha-1-acid glycoprotein 1	ORM1	0.500074	0
P00738	Haptoglobin	HP	0.479047	3e-06
Q08830	Fibrinogen-like protein 1	FGL1	0.446503	0.003128
P0DJI9	Serum amyloid A-2 proteincur	SAA2	0.353233	0.003482
P0DJI8	Serum amyloid A-1 protein	SAA1	0.206951	0.000305
P02741	C-reactive protein	CRP	0.171752	0.00023

## Sheet: D. for Fig.4A
Table S3-B. Cluster anaysis result of all the samples (shown in Fig.4A).
Sample ID	Group	Cluster
H12	Healthy	C0
H14	Healthy	C0
H15	Healthy	C0
H16	Healthy	C0
H18	Healthy	C0
H20	Healthy	C0
H21	Healthy	C0
H3	Healthy	C0
H5	Healthy	C0
H6	Healthy	C0
H7	Healthy	C0
H8	Healthy	C0
H9	Healthy	C0
H2	Healthy	C1
F15	Fever/Cough	C0
F17	Fever/Cough	C0
F22	Fever/Cough	C0
F24	Fever/Cough	C0
F27	Fever/Cough	C0
F28	Fever/Cough	C0
F3	Fever/Cough	C0
F33	Fever/Cough	C0
F36	Fever/Cough	C0
F38	Fever/Cough	C0
F46	Fever/Cough	C0
F6	Fever/Cough	C0
F7	Fever/Cough	C0
S13_1	Asymptomatic	C0
S10_1	Asymptomatic	C1
S11_1	Asymptomatic	C1
S12_1	Asymptomatic	C1
S14_1	Asymptomatic	C1
S15_1	Asymptomatic	C1
S16_1	Asymptomatic	C1
S17_1	Asymptomatic	C1
S18_1	Asymptomatic	C1
S19_1	Asymptomatic	C1
S3_1	Asymptomatic	C1
S4_1	Asymptomatic	C1
S5_1	Asymptomatic	C1
S7_1	Asymptomatic	C1
S8_1	Asymptomatic	C1
S9_1	Asymptomatic	C1
S32_1	Mild	C0
S88_1	Mild	C0
S21_1	Mild	C1
S22_1	Mild	C1
S24_1	Mild	C1
S25_1	Mild	C1
S26_1	Mild	C1
S30_1	Mild	C1
S36_1	Mild	C1
S6_1	Mild	C1
S20_1	Moderate	C1
S29_1	Moderate	C1
S33_1	Moderate	C1
S35_1	Moderate	C1
S45_1	Moderate	C1
S55_1	Moderate	C1
S56_1	Moderate	C1
S62_1	Moderate	C1
S66_1	Moderate	C1
S69_1	Moderate	C1
S71_1	Moderate	C1
S72_1	Moderate	C1
S73_1	Moderate	C1
S74_1	Moderate	C1
S78_1	Moderate	C1
S80_1	Moderate	C1
S81_1	Moderate	C1
S84_1	Moderate	C1
S87_1	Moderate	C1
S91_1	Moderate	C1
S34_1	Moderate	C2
S58_1	Moderate	C2
S60_1	Moderate	C2
S61_1	Moderate	C2
S63_1	Moderate	C2
S64_1	Moderate	C2
S65_1	Moderate	C2
S67_1	Moderate	C2
S75_1	Moderate	C2
S77_1	Moderate	C2
S82_1	Moderate	C2
S85_1	Moderate	C2
S86_1	Moderate	C2
S89_1	Moderate	C2
S90_1	Moderate	C2
S31_1	Moderate	C3
S149_1	Severe	C2
S38_1	Severe	C2
S38_1R	Severe	C2
S40_1	Severe	C2
S41_1	Severe	C2
S44_1	Severe	C2
S129_1	Severe	C3
S37_1	Critical	C1
S50_1	Critical	C1
S39_1	Critical	C2
S43_1	Critical	C2
S47_1	Critical	C2
S48_1	Critical	C2
S49_1	Critical	C2
S51_1	Critical	C2
S52_1	Critical	C2
S54_1	Critical	C2
S54_1R	Critical	C2
S46_1	Critical	C3

## Sheet: E. for Fig.4B
Table S3-E. Enriched KEGG pathways and protein alterations between COVID-19 patients in clusters C2 and C1 (supplementary data for Fig.4B).
Significantly enriched KEGG pathways
Up-regulated
TermID	Term	Protein number	p value	Gene Name
path:hsa04610	Complement and coagulation cascades	28	9.21376e-07	MASP2,F10,F12,CFB,SERPINA1,C5,FGA,C9,F11,C4BPA,VWF,SERPING1,C2,PROS1,C8A,C8B,C8G,C1S,C4A,C4B,MBL2,F5,C6,C4BPB,CFHR2,CFHR3,CFHR1,CFHR5
path:hsa04064	NF-kappa B signaling pathway	4	0.00151624	ICAM1,CD14,LBP,VCAM1
path:hsa05133	Pertussis	9	0.0034512	C5,C4BPA,SERPING1,C2,CD14,C1S,C4A,C4B,C4BPB
Down-regulated
NA
Differential proteins
Accession	Description	Gene Name	Fold change	p value
P02741	C-reactive protein	CRP	3.93738	7e-06
P0DJI8	Serum amyloid A-1 protein	SAA1	3.75777	7e-06
P0DJI9	Serum amyloid A-2 proteincur	SAA2	3.38991	0
P06732	Creatine kinase M-type	CKM	2.82819	0.000253
Q08830	Fibrinogen-like protein 1	FGL1	2.64572	3.4e-05
Q16851	UTP--glucose-1-phosphate uridylyltransferase	UGP2	2.16572	4.9e-05
P25788	Proteasome subunit alpha type-3	PSMA3	1.91832	0.020638
P20618	Proteasome subunit beta type-1	PSMB1	1.91724	0.000944
P00738	Haptoglobin	HP	1.91347	0
P02763	Alpha-1-acid glycoprotein 1	ORM1	1.88765	0
Q8N6C8	Leukocyte immunoglobulin-like receptor subfamily A member 3	LILRA3	1.87852	0.008329
P18428	Lipopolysaccharide-binding protein	LBP	1.85436	0
P15291	Beta-1,4-galactosyltransferase 1	B4GALT1	1.82121	7e-06
P01011	Alpha-1-antichymotrypsin	SERPINA3	1.77592	0
P23381	Tryptophan--tRNA ligase, cytoplasmic	WARS1	1.75469	0.000628
P04080	Cystatin-B	CSTB	1.75117	0.001568
P25786	Proteasome subunit alpha type-1	PSMA1	1.7446	0.000467
Q8WUA8	Tsukushin	TSKU	1.73592	0.000557
P08571	Monocyte differentiation antigen CD14	CD14	1.71008	0
P07988	Pulmonary surfactant-associated protein B	SFTPB	1.67634	0.000199
P29966	Myristoylated alanine-rich C-kinase substrate	MARCKS	1.65621	0.033474
P02750	Leucine-rich alpha-2-glycoprotein	LRG1	1.64447	0
Q8NBJ4	Golgi membrane protein 1	GOLM1	1.63009	9e-06
P02748	Complement component C9	C9	1.62943	0
P11226	Mannose-binding protein C	MBL2	1.61586	1.2e-05
P03973	Antileukoproteinase	SLPI	1.57101	0.045127
P07900	Heat shock protein HSP 90-alpha	HSP90AA1	1.54263	0.000327
P10321	HLA class I histocompatibility antigen, C alpha chain	HLA-C	1.53387	0.002233
Q8NBP7	Proprotein convertase subtilisin/kexin type 9	PCSK9	1.53289	0
P02671	Fibrinogen alpha chain	FGA	1.53115	0.010363
P23141	Liver carboxylesterase 1	CES1	1.52848	0.015861
Q06033	Inter-alpha-trypsin inhibitor heavy chain H3	ITIH3	1.51485	0
O14818	Proteasome subunit alpha type-7	PSMA7	1.49257	0.00331
Q14697	Neutral alpha-glucosidase AB	GANAB	1.49195	0.01621
P13796	Plastin-2	LCP1	1.49182	1e-06
Q99969	Retinoic acid receptor responder protein 2	RARRES2	1.47951	7.6e-05
P12259	Coagulation factor V	F5	1.4764	0
P35542	Serum amyloid A-4 protein	SAA4	1.47615	0
Q9UJJ9	N-acetylglucosamine-1-phosphotransferase subunit gamma	GNPTG	1.476	0
Q02985	Complement factor H-related protein 3	CFHR3	1.46792	2.4e-05
P18065	Insulin-like growth factor-binding protein 2	IGFBP2	1.46677	0
Q86UD1	Out at first protein homolog	OAF	1.45662	2.3e-05
P58166	Inhibin beta E chain	INHBE	1.45153	0.003991
P09960	Leukotriene A-4 hydrolase	LTA4H	1.44615	0.006598
P19652	Alpha-1-acid glycoprotein 2	ORM2	1.44435	1e-06
O75874	Isocitrate dehydrogenase [NADP] cytoplasmic	IDH1	1.43764	0.048844
Q9NPR2	Semaphorin-4B	SEMA4B	1.43215	8.8e-05
P06681	Complement C2	C2	1.42563	0
P00325	All-trans-retinol dehydrogenase [NAD(+)] ADH1B	ADH1B	1.42027	0.011708
Q92823	Neuronal cell adhesion molecule	NRCAM	1.40137	5e-06
Q9UBR2	Cathepsin Z	CTSZ	1.39891	0.016795
P29401	Transketolase	TKT	1.3975	2.2e-05
Q9HDC9	Adipocyte plasma membrane-associated protein	APMAP	1.3869	6.3e-05
P05062	Fructose-bisphosphate aldolase B	ALDOB	1.38217	0.000251
P07339	Cathepsin D	CTSD	1.38183	4.6e-05
Q6Q788	Apolipoprotein A-V	APOA5	1.3804	0.000194
P28799	Progranulin	GRN	1.37409	0.000138
P00338	L-lactate dehydrogenase A chain	LDHA	1.36547	0.000394
P49747	Cartilage oligomeric matrix protein	COMP	1.36517	0.000675
P00748	Coagulation factor XII	F12	1.36511	0.000486
P26038	Moesin	MSN	1.36397	0.00105
Q02818	Nucleobindin-1	NUCB1	1.3616	0.01235
P19320	Vascular cell adhesion protein 1	VCAM1	1.3603	3e-06
Q92954	Proteoglycan 4	PRG4	1.36029	1.8e-05
P0C0L5	Complement C4-B	C4B	1.35786	6e-05
P07307	Asialoglycoprotein receptor 2	ASGR2	1.35126	2.3e-05
Q92820	Gamma-glutamyl hydrolase	GGH	1.34705	5e-06
P02743	Serum amyloid P-component	APCS	1.34335	6e-05
P04275	von Willebrand factor	VWF	1.33715	0.000246
P0C0L4	Complement C4-A	C4A	1.32881	5e-06
Q9BXR6	Complement factor H-related protein 5	CFHR5	1.32868	0
P00751	Complement factor B	CFB	1.32386	0
P05155	Plasma protease C1 inhibitor	SERPING1	1.3231	1.7e-05
P06744	Glucose-6-phosphate isomerase	GPI	1.31799	0.029118
Q9UK55	Protein Z-dependent protease inhibitor	SERPINA10	1.31428	6e-06
A0A0A0MT89	Immunoglobulin kappa joining 1	IGKJ1	1.30894	0.008082
P40925	Malate dehydrogenase, cytoplasmic	MDH1	1.30756	0.013243
Q14520	Hyaluronan-binding protein 2	HABP2	1.30271	0
Q03591	Complement factor H-related protein 1	CFHR1	1.30046	3e-06
P11142	Heat shock cognate 71 kDa protein	HSPA8	1.29985	0.006846
P00450	Ceruloplasmin	CP	1.29571	0
Q12907	Vesicular integral-membrane protein VIP36	LMAN2	1.29473	1.6e-05
P06310	Immunoglobulin kappa variable 2-30	IGKV2-30	1.28989	0.003757
P22897	Macrophage mannose receptor 1	MRC1	1.28986	0.003498
P01009	Alpha-1-antitrypsin	SERPINA1	1.28805	0
P04003	C4b-binding protein alpha chain	C4BPA	1.28762	0
P01833	Polymeric immunoglobulin receptor	PIGR	1.28257	0.000411
P13473	Lysosome-associated membrane glycoprotein 2	LAMP2	1.27514	0.000101
A0A075B6H9	Immunoglobulin lambda variable 4-69	IGLV4-69	1.27513	0.038165
P14543	Nidogen-1	NID1	1.27071	4e-06
P02649	Apolipoprotein E	APOE	1.26543	0.000256
Q9NZP8	Complement C1r subcomponent-like protein	C1RL	1.26147	0
A1L4H1	Soluble scavenger receptor cysteine-rich domain-containing protein SSC5D	SSC5D	1.26131	0.000449
P03951	Coagulation factor XI	F11	1.26035	2.5e-05
Q86U17	Serpin A11	SERPINA11	1.25585	0.000332
P01031	Complement C5	C5	1.25552	0
P13671	Complement component C6	C6	1.25065	0
P36980	Complement factor H-related protein 2	CFHR2	1.24914	0.014652
Q02413	Desmoglein-1	DSG1	1.24792	0.007743
Q08380	Galectin-3-binding protein	LGALS3BP	1.24714	0.000151
P00739	Haptoglobin-related protein	HPR	1.2465	0.004641
P16930	Fumarylacetoacetase	FAH	1.24466	0.000447
Q8WWA0	Intelectin-1	ITLN1	1.24458	0.007248
P00742	Coagulation factor X	F10	1.24414	1e-06
P01705	Immunoglobulin lambda variable 2-23	IGLV2-23	1.2419	0.0306
O14791	Apolipoprotein L1	APOL1	1.23803	0.001804
P12109	Collagen alpha-1(VI) chain	COL6A1	1.23727	0.001136
P15169	Carboxypeptidase N catalytic chain	CPN1	1.2362	6e-06
P15151	Poliovirus receptor	PVR	1.23025	0.000244
P07195	L-lactate dehydrogenase B chain	LDHB	1.23024	0.003376
Q07954	Prolow-density lipoprotein receptor-related protein 1	LRP1	1.2299	1e-06
P33908	Mannosyl-oligosaccharide 1,2-alpha-mannosidase IA	MAN1A1	1.22945	0.000158
Q6UY14	ADAMTS-like protein 4	ADAMTSL4	1.22551	1e-06
P07357	Complement component C8 alpha chain	C8A	1.22479	4e-06
P04040	Catalase	CAT	1.22022	0.002524
P14625	Endoplasmin	HSP90B1	1.22018	4e-06
Q86VB7	Scavenger receptor cysteine-rich type 1 protein M130	CD163	1.21884	0.000733
P20851	C4b-binding protein beta chain	C4BPB	1.21883	8e-06
O95479	GDH/6PGL endoplasmic bifunctional protein	H6PD	1.21872	0.005708
P01714	Immunoglobulin lambda variable 3-19	IGLV3-19	1.21695	0.044835
Q6EMK4	Vasorin	VASN	1.21481	0.000377
Q14624	Inter-alpha-trypsin inhibitor heavy chain H4	ITIH4	1.21322	0
P04066	Tissue alpha-L-fucosidase	FUCA1	1.21198	0.000577
Q9UGM5	Fetuin-B	FETUB	1.21095	5.5e-05
P05362	Intercellular adhesion molecule 1	ICAM1	1.21077	0.000129
Q15582	Transforming growth factor-beta-induced protein ig-h3	TGFBI	1.20902	3.9e-05
P07358	Complement component C8 beta chain	C8B	1.20722	4e-06
P07360	Complement component C8 gamma chain	C8G	1.2043	1e-05
P07225	Vitamin K-dependent protein S	PROS1	1.20311	0
P09871	Complement C1s subcomponent	C1S	1.20229	0
O00187	Mannan-binding lectin serine protease 2	MASP2	1.20175	5e-06
P04114	Apolipoprotein B-100	APOB	1.20019	0.002097
P02749	Beta-2-glycoprotein 1	APOH	0.831399	0.002097
O75144	ICOS ligand	ICOSLG	0.83099	0.000521
O43866	CD5 antigen-like	CD5L	0.827746	0.03516
P04430	Immunoglobulin kappa variable 1-16	IGKV1-16	0.821033	0.001963
P02654	Apolipoprotein C-I	APOC1	0.817913	0.004805
P04196	Histidine-rich glycoprotein	HRG	0.812755	0.00138
P05154	Plasma serine protease inhibitor	SERPINA5	0.798423	0.017072
P26447	Protein S100-A4	S100A4	0.795437	0.023458
P10720	Platelet factor 4 variant	PF4V1	0.794551	0.008312
Q9UHG3	Prenylcysteine oxidase 1	PCYOX1	0.776381	3.2e-05
P01023	Alpha-2-macroglobulin	A2M	0.77318	0.000173
P02751	Fibronectin	FN1	0.771846	0.00138
P05019	Insulin-like growth factor I	IGF1	0.76714	0.002474
Q15485	Ficolin-2	FCN2	0.764375	0.000648
P02766	Transthyretin	TTR	0.724141	2e-06
P62826	GTP-binding nuclear protein Ran	RAN	0.71218	0.029809
A0A075B6S5	Immunoglobulin kappa variable 1-27	IGKV1-27	0.690753	0.028351
P46109	Crk-like protein	CRKL	0.689189	0.04254
Q9HBI1	Beta-parvin	PARVB	0.660764	0.000801
P02042	Hemoglobin subunit delta	HBD	0.607044	0.049807
P68871	Hemoglobin subunit beta	HBB	0.567307	0.048522

## Sheet: F. for Fig.4B
Table S3-F. Enriched KEGG pathways and protein alterations between COVID-19 patients in cluster C3 and other clusters (supplementary data for Fig.4B).
Significantly enriched KEGG pathways
Up-regulated
TermID	Term	Protein number	p value	Gene Name
path:hsa04080	Neuroactive ligand-receptor interaction	4	4.55679e-05	AGT,KNG1,PRSS1,PRSS3
Down-regulated
TermID	Term	Protein number	p value	Gene Name
path:hsa04512	ECM-receptor interaction	12	0.00143416	GP1BA,COL1A1,ITGB1,THBS1,COL6A1,COL6A3,CD44,TNXB,TNC,GP5,HSPG2,DAG1
path:hsa04974	Protein digestion and absorption	6	0.0073903	SLC3A2,CPB2,COL1A1,COL6A1,COL6A3,COL18A1
Differential proteins
Accession	Description	Gene Name	Fold change	p value
P61769	Beta-2-microglobulin	B2M	12.8502	0.003246
P02741	C-reactive protein	CRP	8.58631	0.042464
P35030	Trypsin-3	PRSS3	2.33926	0.00639
P05062	Fructose-bisphosphate aldolase B	ALDOB	2.08514	0.005255
Q15828	Cystatin-M	CST6	2.07095	0.036683
P07988	Pulmonary surfactant-associated protein B	SFTPB	2.06099	0.006433
P01009	Alpha-1-antitrypsin	SERPINA1	1.99319	0.009839
P07477	Trypsin-1	PRSS1	1.95526	0.004668
P01019	Angiotensinogen	AGT	1.87658	0.01514
P09382	Galectin-1	LGALS1	1.69903	0.035317
P00751	Complement factor B	CFB	1.61324	0.005907
O00592	Podocalyxin	PODXL	1.53957	0.025197
Q9BXR6	Complement factor H-related protein 5	CFHR5	1.44256	0.009839
P22792	Carboxypeptidase N subunit 2	CPN2	1.33036	0.017699
P08185	Corticosteroid-binding globulin	SERPINA6	1.32446	0.008805
P20851	C4b-binding protein beta chain	C4BPB	1.31544	0.00931
P01042	Kininogen-1	KNG1	1.30434	0.004668
Q14624	Inter-alpha-trypsin inhibitor heavy chain H4	ITIH4	1.29391	0.044443
P11021	Endoplasmic reticulum chaperone BiP	HSPA5	0.786131	0.040561
P00734	Prothrombin	F2	0.780075	0.007869
P27169	Serum paraoxonase/arylesterase 1	PON1	0.758093	0.042464
Q9BTY2	Plasma alpha-L-fucosidase	FUCA2	0.757639	0.040064
P08253	72 kDa type IV collagenase	MMP2	0.737633	0.033763
P06276	Cholinesterase	BCHE	0.729054	0.012913
P05160	Coagulation factor XIII B chain	F13B	0.728455	0.03873
Q96IY4	Carboxypeptidase B2	CPB2	0.723235	0.019608
P11717	Cation-independent mannose-6-phosphate receptor	IGF2R	0.711527	0.007648
A0A0B4J1Y9	Immunoglobulin heavy variable 3-72	IGHV3-72	0.701241	0.021696
P04217	Alpha-1B-glycoprotein	A1BG	0.700536	0.008805
P02649	Apolipoprotein E	APOE	0.689483	0.030595
P43121	Cell surface glycoprotein MUC18	MCAM	0.68815	0.048634
Q16610	Extracellular matrix protein 1	ECM1	0.684467	0.008326
Q86YW5	Trem-like transcript 1 protein	TREML1	0.683715	0.030595
Q9NZK5	Adenosine deaminase 2	ADA2	0.682285	0.015385
A0A0C4DH35	Probable non-functional immunoglobulin heavy variable 3-35	IGHV3-35	0.669231	0.010981
O00391	Sulfhydryl oxidase 1	QSOX1	0.66538	0.003669
P05121	Plasminogen activator inhibitor 1	SERPINE1	0.661598	0.012975
Q15113	Procollagen C-endopeptidase enhancer 1	PCOLCE	0.661272	0.007869
P06312	Immunoglobulin kappa variable 4-1	IGKV4-1	0.65356	0.014363
Q16706	Alpha-mannosidase 2	MAN2A1	0.64858	0.026456
O95445	Apolipoprotein M	APOM	0.646824	0.006632
P80108	Phosphatidylinositol-glycan-specific phospholipase D	GPLD1	0.641877	0.044443
P05556	Integrin beta-1	ITGB1	0.641852	0.020878
Q9ULI3	Protein HEG homolog 1	HEG1	0.638305	0.018632
O00533	Neural cell adhesion molecule L1-like protein	CHL1	0.63596	0.009839
P12318	Low affinity immunoglobulin gamma Fc region receptor II-a	FCGR2A	0.635229	0.022243
P01601	Immunoglobulin kappa variable 1D-16	IGKV1D-16	0.629832	0.023974
Q86VB7	Scavenger receptor cysteine-rich type 1 protein M130	CD163	0.62824	0.027779
Q9UGM5	Fetuin-B	FETUB	0.62178	0.007869
A0A075B6K5	Immunoglobulin lambda variable 3-9	IGLV3-9	0.621421	0.027779
P35555	Fibrillin-1	FBN1	0.620257	0.009021
P04406	Glyceraldehyde-3-phosphate dehydrogenase	GAPDH	0.619766	0.035279
P06331	Immunoglobulin heavy variable 4-34	IGHV4-34	0.610828	0.004141
A0A0C4DH31	Immunoglobulin heavy variable 1-18	IGHV1-18	0.610157	0.004668
P24821	Tenascin	TNC	0.606804	0.004398
P55056	Apolipoprotein C-IV	APOC4	0.603461	0.026456
Q8WZ75	Roundabout homolog 4	ROBO4	0.601066	0.004695
Q9H4G4	Golgi-associated plant pathogenesis-related protein 1	GLIPR2	0.600676	0.005572
Q13740	CD166 antigen	ALCAM	0.59885	0.005505
Q6UX71	Plexin domain-containing protein 2	PLXDC2	0.597037	0.007436
P08174	Complement decay-accelerating factor	CD55	0.596708	0.018307
Q15166	Serum paraoxonase/lactonase 3	PON3	0.594134	0.00626
P09486	SPARC	SPARC	0.592737	0.003899
P02656	Apolipoprotein C-III	APOC3	0.590227	0.013621
Q13103	Secreted phosphoprotein 24	SPP2	0.586586	0.012238
Q92823	Neuronal cell adhesion molecule	NRCAM	0.57587	0.016351
Q9Y6R7	IgGFc-binding protein	FCGBP	0.575	0.004398
P12109	Collagen alpha-1(VI) chain	COL6A1	0.572927	0.021123
P01137	Transforming growth factor beta-1 proprotein	TGFB1	0.571322	0.00577
P27918	Properdin	CFP	0.569317	0.03873
P01780	Immunoglobulin heavy variable 3-7	IGHV3-7	0.569139	0.003669
P14543	Nidogen-1	NID1	0.567172	0.010981
P22105	Tenascin-X	TNXB	0.566993	0.003452
Q9UJJ9	N-acetylglucosamine-1-phosphotransferase subunit gamma	GNPTG	0.566463	0.046628
Q8NBP7	Proprotein convertase subtilisin/kexin type 9	PCSK9	0.561187	0.026456
P17936	Insulin-like growth factor-binding protein 3	IGFBP3	0.557252	0.017699
Q76LX8	A disintegrin and metalloproteinase with thrombospondin motifs 13	ADAMTS13	0.55614	0.003246
P05546	Heparin cofactor 2	SERPIND1	0.554472	0.005255
Q9UNW1	Multiple inositol polyphosphate phosphatase 1	MINPP1	0.553499	0.003899
P03950	Angiogenin	ANG	0.549314	0.004954
Q92820	Gamma-glutamyl hydrolase	GGH	0.549248	0.005255
A0A087WSY4	Immunoglobulin heavy variable 4-30-2	IGHV4-30-2	0.549214	0.029158
O14786	Neuropilin-1	NRP1	0.548667	0.004141
P15151	Poliovirus receptor	PVR	0.547977	0.012212
P02786	Transferrin receptor protein 1	TFRC	0.547567	0.003452
P35527	Keratin, type I cytoskeletal 9	KRT9	0.542768	0.011594
A0A087WW87	Immunoglobulin kappa variable 2-40	IGKV2-40	0.537699	0.004954
A0A075B6J9	Immunoglobulin lambda variable 2-18	IGLV2-18	0.537291	0.007869
Q9HBB8	Cadherin-related family member 5	CDHR5	0.531558	0.03342
P0DSN7	Probable non-functional immunoglobulinn kappa variable 1D-37	IGKV1D-37	0.530639	0.006813
P24593	Insulin-like growth factor-binding protein 5	IGFBP5	0.527174	0.016929
Q8WWZ8	Oncoprotein-induced transcript 3 protein	OIT3	0.526391	0.008779
P00451	Coagulation factor VIII	F8	0.523012	0.012212
Q01459	Di-N-acetylchitobiase	CTBS	0.522963	0.006632
P03951	Coagulation factor XI	F11	0.52251	0.004668
P40197	Platelet glycoprotein V	GP5	0.522338	0.004141
P01703	Immunoglobulin lambda variable 1-40	IGLV1-40	0.521223	0.00931
P02788	Lactotransferrin	LTF	0.520077	0.010396
P80188	Neutrophil gelatinase-associated lipocalin	LCN2	0.516881	0.012913
Q9Y4L1	Hypoxia up-regulated protein 1	HYOU1	0.515844	0.005101
Q9Y490	Talin-1	TLN1	0.514889	0.016807
P41222	Prostaglandin-H2 D-isomerase	PTGDS	0.514879	0.003653
P04196	Histidine-rich glycoprotein	HRG	0.514239	0.008805
P98160	Basement membrane-specific heparan sulfate proteoglycan core protein	HSPG2	0.513844	0.004398
P02533	Keratin, type I cytoskeletal 14	KRT14	0.513468	0.005255
P33151	Cadherin-5	CDH5	0.512322	0.003899
P43251	Biotinidase	BTD	0.511772	0.003452
P08709	Coagulation factor VII	F7	0.510101	0.004936
A0A075B6Q5	Immunoglobulin heavy variable 3-64	IGHV3-64	0.50989	0.011594
Q6EMK4	Vasorin	VASN	0.506368	0.005572
A0A0B4J1V2	Immunoglobulin heavy variable 2-26	IGHV2-26	0.506263	0.021696
P12111	Collagen alpha-3(VI) chain	COL6A3	0.505293	0.003669
Q9Y5Y7	Lymphatic vessel endothelial hyaluronic acid receptor 1	LYVE1	0.499137	0.018632
P55058	Phospholipid transfer protein	PLTP	0.497502	0.004668
Q9NPR2	Semaphorin-4B	SEMA4B	0.496108	0.018176
Q13201	Multimerin-1	MMRN1	0.49548	0.003452
P07996	Thrombospondin-1	THBS1	0.49503	0.004954
P02538	Keratin, type II cytoskeletal 6A	KRT6A	0.493714	0.005255
P07359	Platelet glycoprotein Ib alpha chain	GP1BA	0.491864	0.005255
P23470	Receptor-type tyrosine-protein phosphatase gamma	PTPRG	0.490355	0.022329
Q92859	Neogenin	NEO1	0.489127	0.004156
Q96PD5	N-acetylmuramoyl-L-alanine amidase	PGLYRP2	0.488705	0.005255
Q9H8L6	Multimerin-2	MMRN2	0.48549	0.007436
P05164	Myeloperoxidase	MPO	0.483563	0.004954
O75882	Attractin	ATRN	0.480765	0.003246
P05067	Amyloid-beta precursor protein	APP	0.480437	0.026863
P55290	Cadherin-13	CDH13	0.48022	0.005907
A0A0B4J1X5	Immunoglobulin heavy variable 3-74	IGHV3-74	0.479333	0.004398
A0A0A0MS14	Immunoglobulin heavy variable 1-45	IGHV1-45	0.475443	0.004398
P01706	Immunoglobulin lambda variable 2-11	IGLV2-11	0.474249	0.012913
P11597	Cholesteryl ester transfer protein	CETP	0.471969	0.014363
Q9UHG3	Prenylcysteine oxidase 1	PCYOX1	0.469862	0.004398
P16930	Fumarylacetoacetase	FAH	0.466715	0.004141
P04066	Tissue alpha-L-fucosidase	FUCA1	0.464939	0.003787
P12955	Xaa-Pro dipeptidase	PEPD	0.463357	0.003246
P08637	Low affinity immunoglobulin gamma Fc region receptor III-A	FCGR3A	0.463064	0.003669
P08195	4F2 cell-surface antigen heavy chain	SLC3A2	0.457651	0.004141
A0A0C4DH34	Immunoglobulin heavy variable 4-28	IGHV4-28	0.454212	0.003246
P30041	Peroxiredoxin-6	PRDX6	0.446914	0.024081
Q12913	Receptor-type tyrosine-protein phosphatase eta	PTPRJ	0.444009	0.003246
P01602	Immunoglobulin kappa variable 1-5	IGKV1-5	0.443515	0.005907
P01700	Immunoglobulin lambda variable 1-47	IGLV1-47	0.440469	0.003452
P02452	Collagen alpha-1(I) chain	COL1A1	0.440193	0.005783
P00918	Carbonic anhydrase 2	CA2	0.439814	0.021696
P01709	Immunoglobulin lambda variable 2-8	IGLV2-8	0.439652	0.006632
A0A0C4DH36	Probable non-functional immunoglobulin heavy variable 3-38	IGHV3-38	0.436127	0.003246
P01766	Immunoglobulin heavy variable 3-13	IGHV3-13	0.435233	0.004141
P32119	Peroxiredoxin-2	PRDX2	0.431437	0.023974
P0DP25	Calmodulin-3	CALM3	0.431178	0.013604
P59665	Neutrophil defensin 1	DEFA1	0.430137	0.016807
A0A0A0MT89	Immunoglobulin kappa joining 1	IGKJ1	0.428442	0.033789
A0A0C4DH29	Immunoglobulin heavy variable 1-3	IGHV1-3	0.42791	0.013621
A0A087WSY6	Immunoglobulin kappa variable 3D-15	IGKV3D-15	0.42631	0.003246
A0A0A0MT36	Immunoglobulin kappa variable 6D-21	IGKV6D-21	0.426026	0.008326
P00748	Coagulation factor XII	F12	0.424084	0.003899
P40189	Interleukin-6 receptor subunit beta	IL6ST	0.424039	0.005835
Q9NPY3	Complement component C1q receptor	CD93	0.42059	0.003579
Q9NPH3	Interleukin-1 receptor accessory protein	IL1RAP	0.419812	0.003246
P01742	Immunoglobulin heavy variable 1-69	IGHV1-69	0.416853	0.003669
P13727	Bone marrow proteoglycan	PRG2	0.416511	0.005135
P02730	Band 3 anion transport protein	SLC4A1	0.416372	0.022329
P16070	CD44 antigen	CD44	0.413335	0.004398
P01714	Immunoglobulin lambda variable 3-19	IGLV3-19	0.410331	0.014363
Q14766	Latent-transforming growth factor beta-binding protein 1	LTBP1	0.409994	0.003246
A0A0C4DH25	Immunoglobulin kappa variable 3D-20	IGKV3D-20	0.409354	0.004141
P00488	Coagulation factor XIII A chain	F13A1	0.408805	0.003246
A0A0C4DH67	Immunoglobulin kappa variable 1-8	IGKV1-8	0.408361	0.003246
Q16270	Insulin-like growth factor-binding protein 7	IGFBP7	0.401551	0.016917
P01599	Immunoglobulin kappa variable 1-17	IGKV1-17	0.399568	0.004141
P01704	Immunoglobulin lambda variable 2-14	IGLV2-14	0.399465	0.014363
P35858	Insulin-like growth factor-binding protein complex acid labile subunit	IGFALS	0.398689	0.003669
P08246	Neutrophil elastase	ELANE	0.394652	0.012913
P26927	Hepatocyte growth factor-like protein	MST1	0.393574	0.003246
Q6Q788	Apolipoprotein A-V	APOA5	0.388542	0.007257
P13473	Lysosome-associated membrane glycoprotein 2	LAMP2	0.381967	0.007257
P01593	Immunoglobulin kappa variable 1D-33	IGKV1D-33	0.381312	0.003246
Q15485	Ficolin-2	FCN2	0.375552	0.004398
A0A075B6S6	Immunoglobulin kappa variable 2D-30	IGKV2D-30	0.355329	0.01312
P15814	Immunoglobulin lambda-like polypeptide 1	IGLL1	0.35431	0.004936
P01619	Immunoglobulin kappa variable 3-20	IGKV3-20	0.348938	0.003669
P05154	Plasma serine protease inhibitor	SERPINA5	0.34377	0.003669
Q9NQ79	Cartilage acidic protein 1	CRTAC1	0.339226	0.003452
O60462	Neuropilin-2	NRP2	0.338842	0.005509
Q86YZ3	Hornerin	HRNR	0.337634	0.005255
P05019	Insulin-like growth factor I	IGF1	0.333523	0.003387
Q99969	Retinoic acid receptor responder protein 2	RARRES2	0.330143	0.003452
A0A0C4DH72	Immunoglobulin kappa variable 1-6	IGKV1-6	0.32282	0.005255
A0A0A0MRZ8	Immunoglobulin kappa variable 3D-11	IGKV3D-11	0.315236	0.003246
A0A075B6H7	Probable non-functional immunoglobulin kappa variable 3-7	IGKV3-7	0.308276	0.003669
Q14533	Keratin, type II cuticular Hb1	KRT81	0.306585	0.004175
Q9Y240	C-type lectin domain family 11 member A	CLEC11A	0.306068	0.021382
P61626	Lysozyme C	LYZ	0.291366	0.003246
P11279	Lysosome-associated membrane glycoprotein 1	LAMP1	0.290912	0.016026
Q9Y6Z7	Collectin-10	COLEC10	0.28571	0.003452
A0A0G2JS06	Immunoglobulin lambda variable 5-39	IGLV5-39	0.279589	0.005572
P30043	Flavin reductase (NADPH)	BLVRB	0.279364	0.003541
P01743	Immunoglobulin heavy variable 1-46	IGHV1-46	0.272201	0.015845
P39060	Collagen alpha-1(XVIII) chain	COL18A1	0.272156	0.003289
Q9BUN1	Protein MENT	MENT	0.271871	0.003669
A0A0B4J2D9	Immunoglobulin kappa variable 1D-13	IGKV1D-13	0.269234	0.003282
P13598	Intercellular adhesion molecule 2	ICAM2	0.267054	0.003309
P06310	Immunoglobulin kappa variable 2-30	IGKV2-30	0.266148	0.003899
P24158	Myeloblastin	PRTN3	0.264601	0.019247
A0A0B4J1U3	Immunoglobulin lambda variable 1-36	IGLV1-36	0.264465	0.007042
A0A075B6H9	Immunoglobulin lambda variable 4-69	IGLV4-69	0.25402	0.005907
Q12860	Contactin-1	CNTN1	0.248912	0.003512
A0A075B6J1	Immunoglobulin lambda variable 5-37	IGLV5-37	0.237284	0.016076
A0A0C4DH24	Immunoglobulin kappa variable 6-21	IGKV6-21	0.236842	0.004623
P01705	Immunoglobulin lambda variable 2-23	IGLV2-23	0.226741	0.004668
A0A0C4DH43	Immunoglobulin heavy variable 2-70D	IGHV2-70D	0.224235	0.025188
P07333	Macrophage colony-stimulating factor 1 receptor	CSF1R	0.199095	0.003538
Q14118	Dystroglycan	DAG1	0.174063	0.003289
P61204	ADP-ribosylation factor 3	ARF3	0.115985	0.003782
Q9UM47	Neurogenic locus notch homolog protein 3	NOTCH3	0.060133	0.003669
Q66K66	Transmembrane protein 198	TMEM198	0.058852	0.003565

## Sheet: G. for Fig.4C
Table S3-G. Enriched KEGG pathways and protein alterations between moderate patients in clusters C2 and C1 (supplementary data for Fig.4C).
Significantly enriched KEGG pathways
Up-regulated
TermID	Term	Protein number	p value	Gene Name
path:hsa04979	Cholesterol metabolism	6	0.000657129	APOC3,APOB,APOE,LRP1,PCSK9,ANGPTL3
path:hsa00511	Other glycan degradation	2	0.00692438	FUCA1,FUCA2
path:hsa04610	Complement and coagulation cascades	11	0.00827276	F10,F12,C9,F11,VWF,SERPIND1,F7,MBL2,F5,CFHR1,CFHR5
Down-regulated
TermID	Term	Protein number	p value	Gene Name
path:hsa04015	Rap1 signaling pathway	6	0.00116094	PFN1,CALM3,CRKL,ACTB,RAP1B,TLN1
path:hsa04971	Gastric acid secretion	3	0.00262956	CA2,CALM3,ACTB
path:hsa04722	Neurotrophin signaling pathway	4	0.00278047	CALM3,CRKL,ARHGDIB,RAP1B
path:hsa04657	IL-17 signaling pathway	3	0.0050184	S100A8,S100A9,LCN2
path:hsa05132	Salmonella infection	4	0.00595303	PFN1,FLNA,RAB7A,ACTB
path:hsa04810	Regulation of actin cytoskeleton	5	0.00780023	PFN1,CFL1,CRKL,ACTB,TMSB4X		Rap1 regulates the actin cytoskeleton
path:hsa05131	Shigellosis	4	0.00819519	PFN1,CRKL,ACTB,TLN1
path:hsa04972	Pancreatic secretion	3	0.0083807	CA2,RAP1B,RAB11A
Differential proteins
Accession	Description	Gene Name	Fold change	p value
P0DJI9	Serum amyloid A-2 proteincur	SAA2	2.1087	0.010924
P15291	Beta-1,4-galactosyltransferase 1	B4GALT1	1.85321	0.009974
A0A075B6S6	Immunoglobulin kappa variable 2D-30	IGKV2D-30	1.82248	0.005237
Q8WUA8	Tsukushin	TSKU	1.63395	0.014874
P01721	Immunoglobulin lambda variable 6-57	IGLV6-57	1.58317	0.049535
P11226	Mannose-binding protein C	MBL2	1.50451	0.001935
P25786	Proteasome subunit alpha type-1	PSMA1	1.50182	0.035692
P00748	Coagulation factor XII	F12	1.49484	0.000527
Q16851	UTP--glucose-1-phosphate uridylyltransferase	UGP2	1.48892	0.043308
P02649	Apolipoprotein E	APOE	1.46529	0.00028
Q6UWP8	Suprabasin	SBSN	1.46228	0.004146
Q06033	Inter-alpha-trypsin inhibitor heavy chain H3	ITIH3	1.45499	0.001728
P12259	Coagulation factor V	F5	1.44133	5e-06
Q6Q788	Apolipoprotein A-V	APOA5	1.44101	0.004385
Q03591	Complement factor H-related protein 1	CFHR1	1.4022	0.000189
O60462	Neuropilin-2	NRP2	1.39315	0.029809
Q99969	Retinoic acid receptor responder protein 2	RARRES2	1.3929	0.000858
Q9HDC9	Adipocyte plasma membrane-associated protein	APMAP	1.37207	0.001542
Q14533	Keratin, type II cuticular Hb1	KRT81	1.37081	0.046088
Q92954	Proteoglycan 4	PRG4	1.36127	0.012419
P18065	Insulin-like growth factor-binding protein 2	IGFBP2	1.35503	0.000674
P08571	Monocyte differentiation antigen CD14	CD14	1.35422	0.000596
P28799	Progranulin	GRN	1.35053	0.027367
P49747	Cartilage oligomeric matrix protein	COMP	1.33424	0.002165
Q16270	Insulin-like growth factor-binding protein 7	IGFBP7	1.3326	0.01164
P13473	Lysosome-associated membrane glycoprotein 2	LAMP2	1.33133	0.004385
P00738	Haptoglobin	HP	1.32635	0.0455
Q9BUN1	Protein MENT	MENT	1.32627	0.005663
P02763	Alpha-1-acid glycoprotein 1	ORM1	1.31822	0.001728
Q9BXR6	Complement factor H-related protein 5	CFHR5	1.30744	0.000318
Q8NBP7	Proprotein convertase subtilisin/kexin type 9	PCSK9	1.29949	0.001224
P02750	Leucine-rich alpha-2-glycoprotein	LRG1	1.29894	0.023411
P07339	Cathepsin D	CTSD	1.29873	0.040239
P02656	Apolipoprotein C-III	APOC3	1.29397	0.006934
P04275	von Willebrand factor	VWF	1.29036	0.014961
Q9NPR2	Semaphorin-4B	SEMA4B	1.28723	0.040602
P55056	Apolipoprotein C-IV	APOC4	1.27979	0.00627
Q9UJJ9	N-acetylglucosamine-1-phosphotransferase subunit gamma	GNPTG	1.27243	0.001505
Q9UGM5	Fetuin-B	FETUB	1.2702	0.000527
Q92823	Neuronal cell adhesion molecule	NRCAM	1.26818	0.029961
P10124	Serglycin	SRGN	1.26714	0.039533
P01011	Alpha-1-antichymotrypsin	SERPINA3	1.26285	0.00627
P04066	Tissue alpha-L-fucosidase	FUCA1	1.26017	0.008765
Q86U17	Serpin A11	SERPINA11	1.25092	0.004607
Q07954	Prolow-density lipoprotein receptor-related protein 1	LRP1	1.24744	0.000674
P02748	Complement component C9	C9	1.24673	0.021448
Q6UY14	ADAMTS-like protein 4	ADAMTSL4	1.24293	0.000246
P34096	Ribonuclease 4	RNASE4	1.23393	0.042019
Q9Y6Z7	Collectin-10	COLEC10	1.23195	0.0027
P10586	Receptor-type tyrosine-protein phosphatase F	PTPRF	1.23128	0.005346
Q9BTY2	Plasma alpha-L-fucosidase	FUCA2	1.22742	0.025151
Q12907	Vesicular integral-membrane protein VIP36	LMAN2	1.22608	0.013638
P12109	Collagen alpha-1(VI) chain	COL6A1	1.21746	0.038297
Q14520	Hyaluronan-binding protein 2	HABP2	1.21705	0.001224
P35542	Serum amyloid A-4 protein	SAA4	1.21493	0.023411
P04114	Apolipoprotein B-100	APOB	1.21392	0.021448
P03951	Coagulation factor XI	F11	1.21379	0.008455
P08709	Coagulation factor VII	F7	1.21292	0.020493
Q8WWA0	Intelectin-1	ITLN1	1.2079	0.012054
P26927	Hepatocyte growth factor-like protein	MST1	1.20592	0.004607
Q9Y5C1	Angiopoietin-related protein 3	ANGPTL3	1.20572	0.011298
Q16853	Membrane primary amine oxidase	AOC3	1.20562	0.042019
P04217	Alpha-1B-glycoprotein	A1BG	1.20493	8.4e-05
P05546	Heparin cofactor 2	SERPIND1	1.20417	0.00511
P12830	Cadherin-1	CDH1	1.20414	0.004728
Q12805	EGF-containing fibulin-like extracellular matrix protein 1	EFEMP1	1.20093	0.002419
P00742	Coagulation factor X	F10	1.2001	0.003353
P05109	Protein S100-A8	S100A8	0.820669	0.0455
P23284	Peptidyl-prolyl cis-trans isomerase B	PPIB	0.808538	0.041659
P80188	Neutrophil gelatinase-associated lipocalin	LCN2	0.804553	0.038766
P08567	Pleckstrin	PLEK	0.803314	0.017949
P60709	Actin, cytoplasmic 1	ACTB	0.799318	0.0455
P62820	Ras-related protein Rab-1A	RAB1A	0.788264	0.034626
Q14847	LIM and SH3 domain protein 1	LASP1	0.782493	0.040946
P04430	Immunoglobulin kappa variable 1-16	IGKV1-16	0.776418	0.030368
P31146	Coronin-1A	CORO1A	0.773895	0.005206
P23528	Cofilin-1	CFL1	0.763235	0.021448
P06702	Protein S100-A9	S100A9	0.755978	0.025527
P37802	Transgelin-2	TAGLN2	0.754668	0.012419
P62826	GTP-binding nuclear protein Ran	RAN	0.745603	0.047202
P62937	Peptidyl-prolyl cis-trans isomerase A	PPIA	0.740642	0.017949
P62987	Ubiquitin-60S ribosomal protein L40	UBA52	0.736946	0.024986
P0DP25	Calmodulin-3	CALM3	0.725839	0.026857
P30041	Peroxiredoxin-6	PRDX6	0.720498	0.046627
P51149	Ras-related protein Rab-7a	RAB7A	0.715788	0.017417
P60174	Triosephosphate isomerase	TPI1	0.714292	0.002419
O00151	PDZ and LIM domain protein 1	PDLIM1	0.701913	0.000674
P62491	Ras-related protein Rab-11A	RAB11A	0.686164	0.00655
P09211	Glutathione S-transferase P	GSTP1	0.679249	0.004417
P62328	Thymosin beta-4	TMSB4X	0.674121	0.004148
Q14019	Coactosin-like protein	COTL1	0.67263	0.001935
P21333	Filamin-A	FLNA	0.663849	0.00011
Q9HBI1	Beta-parvin	PARVB	0.663602	0.001091
Q9H299	SH3 domain-binding glutamic acid-rich-like protein 3	SH3BGRL3	0.644937	0.007661
P07737	Profilin-1	PFN1	0.629857	0.000967
Q9Y490	Talin-1	TLN1	0.62421	0.001374
P01764	Immunoglobulin heavy variable 3-23	IGHV3-23	0.621315	0.028351
P61204	ADP-ribosylation factor 3	ARF3	0.616153	0.002288
P52566	Rho GDP-dissociation inhibitor 2	ARHGDIB	0.611379	0.002768
P67936	Tropomyosin alpha-4 chain	TPM4	0.610258	0.001088
P00558	Phosphoglycerate kinase 1	PGK1	0.605366	0.006044
Q01518	Adenylyl cyclase-associated protein 1	CAP1	0.576196	0.004728
P06703	Protein S100-A6	S100A6	0.557363	0.005511
P61224	Ras-related protein Rap-1b	RAP1B	0.554621	0.012606
A0A075B6S5	Immunoglobulin kappa variable 1-27	IGKV1-27	0.546802	0.049535
P26447	Protein S100-A4	S100A4	0.545397	0.005675
P00918	Carbonic anhydrase 2	CA2	0.487298	0.027807
Q9ULV4	Coronin-1C	CORO1C	0.47828	0.006432
P02042	Hemoglobin subunit delta	HBD	0.472562	0.014961
P69891	Hemoglobin subunit gamma-1	HBG1	0.464063	0.011298
P46109	Crk-like protein	CRKL	0.41666	0.019094
P68871	Hemoglobin subunit beta	HBB	0.413938	0.017949

## Sheet: H. for Fig.4D
Table S3-H. Enriched KEGG pathways and protein alterations between severe/critical and moderate patients in cluster C2 (supplementary data for Fig.4D).
Significantly enriched KEGG pathways
Sig(C3O_C3T).Up.enrichment
TermID	Term	Protein number	p value	Gene Name
path:hsa05132	Salmonella infection	6	0.00218602	PFN1,HSP90AA1,CD14,HSP90B1,RAB7A,ACTB
path:hsa00010	Glycolysis / Gluconeogenesis	7	0.00234667	LDHA,PGK1,ALDOA,ALDOB,ENO1,LDHB,TPI1
path:hsa04657	IL-17 signaling pathway	4	0.0035872	S100A8,S100A9,HSP90AA1,HSP90B1
path:hsa04066	HIF-1 signaling pathway	6	0.00364066	LDHA,PGK1,ALDOA,ALDOB,ENO1,LDHB
path:hsa00620	Pyruvate metabolism	3	0.00836787	LDHA,LDHB,MDH1
path:hsa04064	NF-kappa B signaling pathway	3	0.00836787	CD14,LBP,VCAM1
Sig(C3O_C3T).Down.enrichment
TermID	Term	Protein number	p value	Gene Name
path:hsa04979	Cholesterol metabolism	2	0.00146585	APOA2,APOC2
Accession	Description	Gene Name	Fold change	p value
P61224	Ras-related protein Rap-1b	RAP1B	2.68735	0.005414
P61204	ADP-ribosylation factor 3	ARF3	2.39248	0.020003
P02741	C-reactive protein	CRP	2.36513	0.002189
P02792	Ferritin light chain	FTL	2.11524	0.017417
P52566	Rho GDP-dissociation inhibitor 2	ARHGDIB	2.10852	0.03332
P60709	Actin, cytoplasmic 1	ACTB	2.05348	0.000209
P07737	Profilin-1	PFN1	2.04457	0.036085
P23141	Liver carboxylesterase 1	CES1	1.88681	0.03006
Q16851	UTP--glucose-1-phosphate uridylyltransferase	UGP2	1.87703	0.015087
Q16777	Histone H2A type 2-C	H2AC20	1.86618	0.002824
P00558	Phosphoglycerate kinase 1	PGK1	1.85367	0.016698
P60174	Triosephosphate isomerase	TPI1	1.81623	0.036085
P0DJI8	Serum amyloid A-1 protein	SAA1	1.81037	0.040373
Q06830	Peroxiredoxin-1	PRDX1	1.79167	0.020211
P06703	Protein S100-A6	S100A6	1.78997	0.029522
P62491	Ras-related protein Rab-11A	RAB11A	1.77609	0.021754
Q5QNW6	Histone H2B type 2-F	H2BC18	1.75117	0.006127
P0DJI9	Serum amyloid A-2 proteincur	SAA2	1.74247	0.002853
P18428	Lipopolysaccharide-binding protein	LBP	1.71725	3.7e-05
O14818	Proteasome subunit alpha type-7	PSMA7	1.69772	0.006285
Q15942	Zyxin	ZYX	1.6737	0.025347
P62805	Histone H4	H4C1	1.66841	0.006127
Q08830	Fibrinogen-like protein 1	FGL1	1.66524	0.047509
P63104	14-3-3 protein zeta/delta	YWHAZ	1.65546	0.006127
P62258	14-3-3 protein epsilon	YWHAE	1.64797	0.02828
P23284	Peptidyl-prolyl cis-trans isomerase B	PPIB	1.62686	0.029577
Q04917	14-3-3 protein eta	YWHAH	1.60874	0.023342
Q12841	Follistatin-related protein 1	FSTL1	1.6018	0.006485
P30041	Peroxiredoxin-6	PRDX6	1.60079	0.029577
Q02818	Nucleobindin-1	NUCB1	1.5964	0.005479
A0A075B6R2	Immunoglobulin heavy variable 4-4	IGHV4-4	1.59111	0.022594
P05109	Protein S100-A8	S100A8	1.58708	0.010569
A0A0C4DH29	Immunoglobulin heavy variable 1-3	IGHV1-3	1.58375	0.010569
P13796	Plastin-2	LCP1	1.57656	0.00012
P06702	Protein S100-A9	S100A9	1.5623	0.015588
P40925	Malate dehydrogenase, cytoplasmic	MDH1	1.55564	0.007686
P26038	Moesin	MSN	1.55412	0.000839
P06733	Alpha-enolase	ENO1	1.55099	0.020003
P07900	Heat shock protein HSP 90-alpha	HSP90AA1	1.54844	0.006923
P31146	Coronin-1A	CORO1A	1.54776	0.004678
P61769	Beta-2-microglobulin	B2M	1.52153	0.004611
Q15063	Periostin	POSTN	1.50869	0.000839
P09960	Leukotriene A-4 hydrolase	LTA4H	1.50187	0.011134
O95497	Pantetheinase	VNN1	1.49083	0.006285
P51149	Ras-related protein Rab-7a	RAB7A	1.47274	0.007077
P08246	Neutrophil elastase	ELANE	1.46503	0.022594
Q8NBJ4	Golgi membrane protein 1	GOLM1	1.46068	0.019631
P01703	Immunoglobulin lambda variable 1-40	IGLV1-40	1.45813	0.013721
P19320	Vascular cell adhesion protein 1	VCAM1	1.45477	8.2e-05
P37837	Transaldolase	TALDO1	1.44793	0.018204
P00338	L-lactate dehydrogenase A chain	LDHA	1.44414	0.005321
P01011	Alpha-1-antichymotrypsin	SERPINA3	1.44193	0.00012
P07195	L-lactate dehydrogenase B chain	LDHB	1.42495	0.00025
P07988	Pulmonary surfactant-associated protein B	SFTPB	1.42274	0.024343
Q86U17	Serpin A11	SERPINA11	1.38558	0.00025
P84243	Histone H3.3	H3-3A	1.37684	0.00925
Q6YHK3	CD109 antigen	CD109	1.3762	0.008769
O95479	GDH/6PGL endoplasmic bifunctional protein	H6PD	1.35593	0.022594
P22897	Macrophage mannose receptor 1	MRC1	1.35327	0.016698
P05155	Plasma protease C1 inhibitor	SERPING1	1.34913	0.002966
P01833	Polymeric immunoglobulin receptor	PIGR	1.34215	0.006127
P54289	Voltage-dependent calcium channel subunit alpha-2/delta-1	CACNA2D1	1.34041	0.039318
P02763	Alpha-1-acid glycoprotein 1	ORM1	1.33642	0.00071
Q8NBP7	Proprotein convertase subtilisin/kexin type 9	PCSK9	1.32992	0.000839
P04075	Fructose-bisphosphate aldolase A	ALDOA	1.32653	0.002189
P18065	Insulin-like growth factor-binding protein 2	IGFBP2	1.32238	0.006127
A0A075B6Q5	Immunoglobulin heavy variable 3-64	IGHV3-64	1.31944	0.040373
P07602	Prosaposin	PSAP	1.30188	0.007659
A0A0A0MS15	Immunoglobulin heavy variable 3-49	IGHV3-49	1.28754	0.005321
P59665	Neutrophil defensin 1	DEFA1	1.28319	0.020003
P04040	Catalase	CAT	1.27893	0.045087
P05062	Fructose-bisphosphate aldolase B	ALDOB	1.26635	0.017675
P19652	Alpha-1-acid glycoprotein 2	ORM2	1.2652	0.040373
P00390	Glutathione reductase, mitochondrial	GSR	1.25927	0.020003
Q9HDC9	Adipocyte plasma membrane-associated protein	APMAP	1.25739	0.015588
Q86UD1	Out at first protein homolog	OAF	1.25617	0.027402
Q15582	Transforming growth factor-beta-induced protein ig-h3	TGFBI	1.24654	0.000989
P08571	Monocyte differentiation antigen CD14	CD14	1.24437	0.001602
P07307	Asialoglycoprotein receptor 2	ASGR2	1.24419	0.036085
P13489	Ribonuclease inhibitor	RNH1	1.23838	0.032125
P14625	Endoplasmin	HSP90B1	1.23703	0.000209
Q13093	Platelet-activating factor acetylhydrolase	PLA2G7	1.23656	0.026989
A0A0C4DH38	Immunoglobulin heavy variable 5-51	IGHV5-51	1.22867	0.006127
Q92820	Gamma-glutamyl hydrolase	GGH	1.22139	0.028662
P02750	Leucine-rich alpha-2-glycoprotein	LRG1	1.22075	0.012054
Q14126	Desmoglein-2	DSG2	1.21784	0.008595
P01009	Alpha-1-antitrypsin	SERPINA1	1.21599	0.006127
P14543	Nidogen-1	NID1	1.21261	0.045087
P15151	Poliovirus receptor	PVR	1.21109	0.012347
P55103	Inhibin beta C chain	INHBC	1.2022	0.036085
P02655	Apolipoprotein C-II	APOC2	0.83189	0.045087
P02652	Apolipoprotein A-II	APOA2	0.804827	0.001367
O95445	Apolipoprotein M	APOM	0.776814	0.006127
P02753	Retinol-binding protein 4	RBP4	0.733804	0.007043
Q01459	Di-N-acetylchitobiase	CTBS	0.723863	0.002551
Q13477	Mucosal addressin cell adhesion molecule 1	MADCAM1	0.709566	0.04461
P24593	Insulin-like growth factor-binding protein 5	IGFBP5	0.706706	0.005239
A0A075B6S6	Immunoglobulin kappa variable 2D-30	IGKV2D-30	0.496367	0.002396
